# Supplementary material
Source: PubMed Central journal article supplement (PMC11058410)
Supplement: freeneuropathol-05-10-5373-s6.pdf [file freeneuropathol-05-10-5373-s6.pdf]

| Study                 | Year | Link                                                                                              | Storage Chemical Category | Found Outside of Formal Search? |
|-----------------------|------|---------------------------------------------------------------------------------------------------|---------------------------|---------------------------------|
| Hashida 1970          | 1970 | <a href="https://pubmed.ncbi.nlm.nih.gov/4315517/">https://pubmed.ncbi.nlm.nih.gov/4315517/</a>   | Aldehyde                  | No                              |
| Itoyama 1980          | 1980 | <a href="https://pubmed.ncbi.nlm.nih.gov/6154439/">https://pubmed.ncbi.nlm.nih.gov/6154439/</a>   | Aldehyde                  | No                              |
| D'Amelio 1983         | 1983 | <a href="https://pubmed.ncbi.nlm.nih.gov/6194584/">https://pubmed.ncbi.nlm.nih.gov/6194584/</a>   | Aldehyde                  | No                              |
| Volk 1986             | 1986 | <a href="https://pubmed.ncbi.nlm.nih.gov/3708958/">https://pubmed.ncbi.nlm.nih.gov/3708958/</a>   | Aldehyde                  | No                              |
| Rozemuller 1988       | 1988 | <a href="https://pubmed.ncbi.nlm.nih.gov/3185857/">https://pubmed.ncbi.nlm.nih.gov/3185857/</a>   | Aldehyde                  | No                              |
| Hayashi 1988          | 1988 | <a href="https://pubmed.ncbi.nlm.nih.gov/3282006/">https://pubmed.ncbi.nlm.nih.gov/3282006/</a>   | Aldehyde                  | No                              |
| McQuaid 1990          | 1990 | <a href="https://pubmed.ncbi.nlm.nih.gov/2187906/">https://pubmed.ncbi.nlm.nih.gov/2187906/</a>   | Aldehyde                  | No                              |
| Wilcock 1990          | 1990 | <a href="https://pubmed.ncbi.nlm.nih.gov/1691572/">https://pubmed.ncbi.nlm.nih.gov/1691572/</a>   | Aldehyde                  | No                              |
| Panayotacopoulou 1991 | 1991 | <a href="https://pubmed.ncbi.nlm.nih.gov/1684832/">https://pubmed.ncbi.nlm.nih.gov/1684832/</a>   | Aldehyde                  | No                              |
| Morán 1992            | 1992 | <a href="https://pubmed.ncbi.nlm.nih.gov/1528073/">https://pubmed.ncbi.nlm.nih.gov/1528073/</a>   | Cryoprotectant            | No                              |
| Sillevis Smitt 1993   | 1993 | <a href="https://pubmed.ncbi.nlm.nih.gov/7506474/">https://pubmed.ncbi.nlm.nih.gov/7506474/</a>   | Aldehyde                  | No                              |
| Evers 1994            | 1994 | <a href="https://pubmed.ncbi.nlm.nih.gov/7723380/">https://pubmed.ncbi.nlm.nih.gov/7723380/</a>   | Aldehyde                  | No                              |
| Reynolds 1994         | 1994 | <a href="https://pubmed.ncbi.nlm.nih.gov/7815087/">https://pubmed.ncbi.nlm.nih.gov/7815087/</a>   | Buffer                    | No                              |
| Eastwood 1994         | 1994 | <a href="https://pubmed.ncbi.nlm.nih.gov/8058126/">https://pubmed.ncbi.nlm.nih.gov/8058126/</a>   | Aldehyde                  | No                              |
| Evers 1995            | 1995 | <a href="https://pubmed.ncbi.nlm.nih.gov/7983356/">https://pubmed.ncbi.nlm.nih.gov/7983356/</a>   | Aldehyde                  | No                              |
| Gullotta 1996         | 1996 | <a href="https://pubmed.ncbi.nlm.nih.gov/8677024/">https://pubmed.ncbi.nlm.nih.gov/8677024/</a>   | Aldehyde                  | No                              |
| Evers 1997            | 1997 | <a href="https://pubmed.ncbi.nlm.nih.gov/9133585/">https://pubmed.ncbi.nlm.nih.gov/9133585/</a>   | Aldehyde                  | No                              |
| Dwork 1998            | 1998 | <a href="https://pubmed.ncbi.nlm.nih.gov/9496540/">https://pubmed.ncbi.nlm.nih.gov/9496540/</a>   | Aldehyde                  | No                              |
| Martins 1999          | 1999 | <a href="https://pubmed.ncbi.nlm.nih.gov/10595700/">https://pubmed.ncbi.nlm.nih.gov/10595700/</a> | Aldehyde                  | No                              |
| Sheaffer 1999         | 1999 | <a href="https://pubmed.ncbi.nlm.nih.gov/10580558/">https://pubmed.ncbi.nlm.nih.gov/10580558/</a> | Aldehyde                  | No                              |
| Romijn 1999a          | 1999 | <a href="https://pubmed.ncbi.nlm.nih.gov/9889258/">https://pubmed.ncbi.nlm.nih.gov/9889258/</a>   | Cryoprotectant            | No                              |
| Privat 2000           | 2000 | <a href="https://pubmed.ncbi.nlm.nih.gov/10871545/">https://pubmed.ncbi.nlm.nih.gov/10871545/</a> | Aldehyde                  | No                              |
| Wu 2002               | 2002 | <a href="https://pubmed.ncbi.nlm.nih.gov/12010215/">https://pubmed.ncbi.nlm.nih.gov/12010215/</a> | Aldehyde                  | No                              |
| Rosoklija 2003        | 2003 | <a href="https://pubmed.ncbi.nlm.nih.gov/14659818/">https://pubmed.ncbi.nlm.nih.gov/14659818/</a> | Aldehyde                  | No                              |
| Larsen 2003           | 2003 | <a href="https://pubmed.ncbi.nlm.nih.gov/12973681/">https://pubmed.ncbi.nlm.nih.gov/12973681/</a> | Aldehyde                  | No                              |
| Lyck 2008             | 2008 | <a href="https://pubmed.ncbi.nlm.nih.gov/17998570/">https://pubmed.ncbi.nlm.nih.gov/17998570/</a> | Aldehyde                  | No                              |
| Alelú-Paz 2008        | 2008 | <a href="https://pubmed.ncbi.nlm.nih.gov/18852880/">https://pubmed.ncbi.nlm.nih.gov/18852880/</a> | Aldehyde                  | No                              |
| Burke 2009            | 2009 | <a href="https://pubmed.ncbi.nlm.nih.gov/19633641/">https://pubmed.ncbi.nlm.nih.gov/19633641/</a> | Cryoprotectant            | No                              |
| Liu 2010              | 2010 | <a href="https://pubmed.ncbi.nlm.nih.gov/20435066/">https://pubmed.ncbi.nlm.nih.gov/20435066/</a> | Aldehyde                  | No                              |
| Pikkarainen 2010      | 2010 | <a href="https://pubmed.ncbi.nlm.nih.gov/20010304/">https://pubmed.ncbi.nlm.nih.gov/20010304/</a> | Aldehyde                  | No                              |
| Dall'Oglio 2010       | 2010 | <a href="https://pubmed.ncbi.nlm.nih.gov/20347871/">https://pubmed.ncbi.nlm.nih.gov/20347871/</a> | Aldehyde                  | No                              |
| van Duijn 2011        | 2011 | <a href="https://pubmed.ncbi.nlm.nih.gov/21305598/">https://pubmed.ncbi.nlm.nih.gov/21305598/</a> | Aldehyde                  | No                              |
| Martins 2011          | 2011 | <a href="https://pubmed.ncbi.nlm.nih.gov/21420432/">https://pubmed.ncbi.nlm.nih.gov/21420432/</a> | Aldehyde                  | No                              |
| Levine 2013           | 2013 | <a href="https://pubmed.ncbi.nlm.nih.gov/23313849/">https://pubmed.ncbi.nlm.nih.gov/23313849/</a> | Buffer                    | No                              |
| Herai 2014            | 2014 | <a href="https://pubmed.ncbi.nlm.nih.gov/24992573/">https://pubmed.ncbi.nlm.nih.gov/24992573/</a> | Aldehyde                  | No                              |

| Study               | Year | Link                                                                                                            | Storage Chemical Category | Found Outside of Formal Search? |
|---------------------|------|-----------------------------------------------------------------------------------------------------------------|---------------------------|---------------------------------|
| Preusse-Prange 2014 | 2014 | <a href="https://pubmed.ncbi.nlm.nih.gov/24447452/">https://pubmed.ncbi.nlm.nih.gov/24447452/</a>               | Aldehyde                  | No                              |
| Liu 2014            | 2014 | <a href="https://pubmed.ncbi.nlm.nih.gov/24721148/">https://pubmed.ncbi.nlm.nih.gov/24721148/</a>               | Aldehyde                  | No                              |
| Rouleau 2016        | 2016 | <a href="https://pubmed.ncbi.nlm.nih.gov/27208828/">https://pubmed.ncbi.nlm.nih.gov/27208828/</a>               | Alcohol                   | No                              |
| Phillips 2016       | 2016 | <a href="https://pubmed.ncbi.nlm.nih.gov/27181107/">https://pubmed.ncbi.nlm.nih.gov/27181107/</a>               | Aldehyde                  | No                              |
| Harrison 2018       | 2018 | <a href="https://pubmed.ncbi.nlm.nih.gov/29520782/">https://pubmed.ncbi.nlm.nih.gov/29520782/</a>               | Aldehyde                  | No                              |
| Lai 2018            | 2018 | <a href="https://pubmed.ncbi.nlm.nih.gov/29540691/">https://pubmed.ncbi.nlm.nih.gov/29540691/</a>               | Aldehyde                  | No                              |
| Alrafiah 2019       | 2019 | <a href="https://pubmed.ncbi.nlm.nih.gov/30371933/">https://pubmed.ncbi.nlm.nih.gov/30371933/</a>               | Aldehyde                  | No                              |
| Quesseveur 2019     | 2019 | <a href="https://pubmed.ncbi.nlm.nih.gov/30617974/">https://pubmed.ncbi.nlm.nih.gov/30617974/</a>               | Aldehyde                  | No                              |
| Hildebrand 2019     | 2019 | <a href="https://pubmed.ncbi.nlm.nih.gov/31350519/">https://pubmed.ncbi.nlm.nih.gov/31350519/</a>               | Aldehyde                  | No                              |
| Lundström 2019      | 2019 | <a href="https://pubmed.ncbi.nlm.nih.gov/29912765/">https://pubmed.ncbi.nlm.nih.gov/29912765/</a>               | Aldehyde                  | No                              |
| Öztürk 2022         | 2022 | <a href="https://pubmed.ncbi.nlm.nih.gov/35476150/">https://pubmed.ncbi.nlm.nih.gov/35476150/</a>               | Aldehyde                  | No                              |
| Sufieva 2022        | 2022 | <a href="https://pubmed.ncbi.nlm.nih.gov/35876684/">https://pubmed.ncbi.nlm.nih.gov/35876684/</a>               | Cleared storage           | No                              |
| Wu 2022             | 2022 | <a href="https://pubmed.ncbi.nlm.nih.gov/35358895/">https://pubmed.ncbi.nlm.nih.gov/35358895/</a>               | Aldehyde                  | No                              |
| Strnad 2022         | 2022 | <a href="https://pubmed.ncbi.nlm.nih.gov/34902152/">https://pubmed.ncbi.nlm.nih.gov/34902152/</a>               | Cryoprotectant            | No                              |
| Woelfle 2023        | 2023 | <a href="https://pubmed.ncbi.nlm.nih.gov/37221592/">https://pubmed.ncbi.nlm.nih.gov/37221592/</a>               | Aldehyde                  | No                              |
| Smith 1956          | 1956 | <a href="https://pubmed.ncbi.nlm.nih.gov/13320161/">https://pubmed.ncbi.nlm.nih.gov/13320161/</a>               | Aldehyde                  | Yes                             |
| Swaab 1982          | 1982 | <a href="https://scholar.google.com/scholar?hl=de&amp;as_">https://scholar.google.com/scholar?hl=de&amp;as_</a> | Aldehyde                  | Yes                             |
| Guntern 1989        | 1989 | <a href="https://pubmed.ncbi.nlm.nih.gov/2646140/">https://pubmed.ncbi.nlm.nih.gov/2646140/</a>                 | Aldehyde                  | Yes                             |
| Feirabend 1991      | 1991 | <a href="https://pubmed.ncbi.nlm.nih.gov/1726666/">https://pubmed.ncbi.nlm.nih.gov/1726666/</a>                 | Aldehyde                  | Yes                             |
| Ploeger 1993        | 1993 | <a href="https://pubmed.ncbi.nlm.nih.gov/7513535/">https://pubmed.ncbi.nlm.nih.gov/7513535/</a>                 | Aldehyde                  | Yes                             |
| Ravid 1993          | 1993 | <a href="https://pubmed.ncbi.nlm.nih.gov/8360654/">https://pubmed.ncbi.nlm.nih.gov/8360654/</a>                 | Aldehyde                  | Yes                             |
| Wisniewski 1994     | 1994 | <a href="https://pubmed.ncbi.nlm.nih.gov/7888152/">https://pubmed.ncbi.nlm.nih.gov/7888152/</a>                 | Aldehyde                  | Yes                             |
| Sarnat 1999         | 1999 | <a href="https://pubmed.ncbi.nlm.nih.gov/10082252/">https://pubmed.ncbi.nlm.nih.gov/10082252/</a>               | Aldehyde                  | Yes                             |
| Heinsen 2000        | 2000 | <a href="https://pubmed.ncbi.nlm.nih.gov/11074343/">https://pubmed.ncbi.nlm.nih.gov/11074343/</a>               | Aldehyde                  | Yes                             |
| Liang 2004          | 2004 | <a href="https://pubmed.ncbi.nlm.nih.gov/15067721/">https://pubmed.ncbi.nlm.nih.gov/15067721/</a>               | Aldehyde                  | Yes                             |
| Miguel-Hidalgo 2010 | 2010 | <a href="https://pubmed.ncbi.nlm.nih.gov/17067348/">https://pubmed.ncbi.nlm.nih.gov/17067348/</a>               | Aldehyde                  | Yes                             |
| Mostegl 2011        | 2011 | <a href="https://pubmed.ncbi.nlm.nih.gov/22362804/">https://pubmed.ncbi.nlm.nih.gov/22362804/</a>               | Aldehyde                  | Yes                             |
| Chung 2013          | 2013 | <a href="https://pubmed.ncbi.nlm.nih.gov/23575631/">https://pubmed.ncbi.nlm.nih.gov/23575631/</a>               | Aldehyde                  | Yes                             |
| Cook 2015           | 2015 | <a href="https://www.scirp.org/html/1-2790064_52307.f">https://www.scirp.org/html/1-2790064_52307.f</a>         | Aldehyde                  | Yes                             |
| Bouvier 2016        | 2016 | <a href="https://pubmed.ncbi.nlm.nih.gov/27090093/">https://pubmed.ncbi.nlm.nih.gov/27090093/</a>               | Aldehyde                  | Yes                             |
| Hildebrand 2020     | 2020 | <a href="https://pubmed.ncbi.nlm.nih.gov/32561795/">https://pubmed.ncbi.nlm.nih.gov/32561795/</a>               | Aldehyde                  | Yes                             |
| Costantini 2020     | 2020 | <a href="https://www.biorxiv.org/content/10.1101/2020.6">https://www.biorxiv.org/content/10.1101/2020.6</a>     | Aldehyde                  | Yes                             |
| Flor-García 2020    | 2020 | <a href="https://pubmed.ncbi.nlm.nih.gov/31915385/">https://pubmed.ncbi.nlm.nih.gov/31915385/</a>               | Aldehyde                  | Yes                             |
| Chen 2020           | 2020 | <a href="https://pubmed.ncbi.nlm.nih.gov/31715144/">https://pubmed.ncbi.nlm.nih.gov/31715144/</a>               | Aldehyde                  | Yes                             |

| Study            | Year | Link                                                                                                          | Storage Chemical Category | Found Outside of Formal Search? |
|------------------|------|---------------------------------------------------------------------------------------------------------------|---------------------------|---------------------------------|
| Herbin 2021      | 2021 | <a href="https://doi.org/10.14351/0831-4985-34.1.157">https://doi.org/10.14351/0831-4985-34.1.157</a>         | Aldehyde                  | Yes                             |
| Larsen 2021      | 2021 | <a href="https://pubmed.ncbi.nlm.nih.gov/34475516/">https://pubmed.ncbi.nlm.nih.gov/34475516/</a>             | Aldehyde                  | Yes                             |
| Shan 2022        | 2022 | <a href="https://pubmed.ncbi.nlm.nih.gov/35351101/">https://pubmed.ncbi.nlm.nih.gov/35351101/</a>             | Aldehyde                  | Yes                             |
| Wiggermann 2022  | 2022 | <a href="https://pubmed.ncbi.nlm.nih.gov/36720269/">https://pubmed.ncbi.nlm.nih.gov/36720269/</a>             | Aldehyde                  | Yes                             |
| Insausti 2023    | 2023 | <a href="https://pubmed.ncbi.nlm.nih.gov/37034833/">https://pubmed.ncbi.nlm.nih.gov/37034833/</a>             | Aldehyde                  | Yes                             |
| Schueth 2023     | 2023 | <a href="https://pubmed.ncbi.nlm.nih.gov/36781939/">https://pubmed.ncbi.nlm.nih.gov/36781939/</a>             | Aldehyde                  | Yes                             |
| Lin 2023         | 2023 | <a href="https://www.biorxiv.org/content/10.1101/2022.1">https://www.biorxiv.org/content/10.1101/2022.1</a>   | Aldehyde                  | Yes                             |
| Watson 1986      | 1986 | <a href="https://pubmed.ncbi.nlm.nih.gov/3520509/">https://pubmed.ncbi.nlm.nih.gov/3520509/</a>               | Buffer                    | Yes                             |
| Beach 2015       | 2015 | <a href="https://pubmed.ncbi.nlm.nih.gov/25619230/">https://pubmed.ncbi.nlm.nih.gov/25619230/</a>             | Buffer                    | Yes                             |
| Sele 2020        | 2020 | <a href="https://forschung.medunigraz.at/fodok/suchen">https://forschung.medunigraz.at/fodok/suchen</a>       | Buffer                    | Yes                             |
| Van Gieson 1889  | 1889 | <a href="https://collections.nlm.nih.gov/catalog.nlm.nlm">https://collections.nlm.nih.gov/catalog.nlm.nlm</a> | Alcohol                   | Yes                             |
| Helms 2014       | 2014 | <a href="https://archive.ismrm.org/2014/1781.html">https://archive.ismrm.org/2014/1781.html</a>               | Alcohol                   | Yes                             |
| Liu 2016         | 2016 | <a href="https://pubmed.ncbi.nlm.nih.gov/26526972/">https://pubmed.ncbi.nlm.nih.gov/26526972/</a>             | Cleared storage           | Yes                             |
| Hahn 2019        | 2019 | <a href="https://pubmed.ncbi.nlm.nih.gov/30932329/">https://pubmed.ncbi.nlm.nih.gov/30932329/</a>             | Cleared storage           | Yes                             |
| Zhao 2020        | 2020 | <a href="https://www.ncbi.nlm.nih.gov/pmc/articles/PMC">https://www.ncbi.nlm.nih.gov/pmc/articles/PMC</a>     | Cleared storage           | Yes                             |
| Mai 2022         | 2022 | <a href="https://pubmed.ncbi.nlm.nih.gov/35859136/">https://pubmed.ncbi.nlm.nih.gov/35859136/</a>             | Cleared storage           | Yes                             |
| Myers 1977       | 1977 | <a href="https://pubmed.ncbi.nlm.nih.gov/402783/">https://pubmed.ncbi.nlm.nih.gov/402783/</a>                 | Cryoprotectant            | Yes                             |
| Wakabayashi 1993 | 1993 | <a href="https://pubmed.ncbi.nlm.nih.gov/7512948/">https://pubmed.ncbi.nlm.nih.gov/7512948/</a>               | Cryoprotectant            | Yes                             |
| Romijn 1999b     | 1999 | <a href="https://pubmed.ncbi.nlm.nih.gov/10375651/">https://pubmed.ncbi.nlm.nih.gov/10375651/</a>             | Cryoprotectant            | Yes                             |
| Monteiro 2008    | 2008 | <a href="https://core.ac.uk/reader/15563280">https://core.ac.uk/reader/15563280</a>                           | Cryoprotectant            | Yes                             |
| Hughes 2016      | 2016 | <a href="https://pubmed.ncbi.nlm.nih.gov/27196138/">https://pubmed.ncbi.nlm.nih.gov/27196138/</a>             | Cryoprotectant            | Yes                             |
| Robards 1993     | 1993 | <a href="https://scholar.google.com/scholar?cluster=10">https://scholar.google.com/scholar?cluster=10</a>     | Aldehyde                  | Yes                             |
