# Supplementary material
Source: PubMed Central journal article supplement (PMC11058410)
Supplement: freeneuropathol-05-10-5373-s7.pdf [file freeneuropathol-05-10-5373-s7.pdf]

| Study          | Year | Link                                                      | Storage conditions                                                       | Storage duration for reported outcome | Visualization method                                                           | Observation category predominant | Storage effect (An asterisk (*) indicates that the study does not specifically comment on histologic storage effects, but it can be inferred based on their results.)     | Effect on morphology | Effect on morphology | Consensus grade         | Category of change | Effect on morphology grade notes | Relevant text                                                                                                                                                                                                                                                                                                                                                                                                                                                                                                                                                                                                                                                                                                                                                                                                                                                                                                                                                                                                                                       |
|----------------|------|-----------------------------------------------------------|--------------------------------------------------------------------------|---------------------------------------|--------------------------------------------------------------------------------|----------------------------------|---------------------------------------------------------------------------------------------------------------------------------------------------------------------------|----------------------|----------------------|-------------------------|--------------------|----------------------------------|-----------------------------------------------------------------------------------------------------------------------------------------------------------------------------------------------------------------------------------------------------------------------------------------------------------------------------------------------------------------------------------------------------------------------------------------------------------------------------------------------------------------------------------------------------------------------------------------------------------------------------------------------------------------------------------------------------------------------------------------------------------------------------------------------------------------------------------------------------------------------------------------------------------------------------------------------------------------------------------------------------------------------------------------------------|
| Dwork 1998     | 1998 | <a href="#">https://pubmed.ncbi.nlm.nih.gov/9444444/</a>  | Formalin                                                                 | 51 years                              | Light microscopy after staining for ubiquitin                                  | Biomolecular staining            | Detected plaques and tangles with no reported change                                                                                                                      | 0                    | 0                    | 0                       | 0                  |                                  |                                                                                                                                                                                                                                                                                                                                                                                                                                                                                                                                                                                                                                                                                                                                                                                                                                                                                                                                                                                                                                                     |
| Dwork 1998     | 1998 | <a href="#">https://pubmed.ncbi.nlm.nih.gov/9444444/</a>  | Formalin                                                                 | 51 years                              | Light microscopy after staining with the 4D5 antibody for p-amyloid            | Biomolecular staining            | Detected plaques with no reported change                                                                                                                                  | 0                    | 0                    | 0                       | 0                  |                                  |                                                                                                                                                                                                                                                                                                                                                                                                                                                                                                                                                                                                                                                                                                                                                                                                                                                                                                                                                                                                                                                     |
| Dwork 1998     | 1998 | <a href="#">https://pubmed.ncbi.nlm.nih.gov/9444444/</a>  | Formalin                                                                 | 51 years                              | Light microscopy after staining with the Aβ20 antibody for tauNFTs             | Biomolecular staining            | Detected neurofibrillary tangles, including intensely stained neurons                                                                                                     | 0                    | 0                    | 0                       | 0                  |                                  |                                                                                                                                                                                                                                                                                                                                                                                                                                                                                                                                                                                                                                                                                                                                                                                                                                                                                                                                                                                                                                                     |
| Dwork 1998     | 1998 | <a href="#">https://pubmed.ncbi.nlm.nih.gov/9444444/</a>  | Formalin                                                                 | 9 years                               | Light microscopy after staining with the Aβ20 antibody for tau                 | Biomolecular staining            | Immunoreactivity well preserved                                                                                                                                           | 0                    | 0                    | 0                       | 0                  |                                  | "Aβ20 immunoreactivity, however, while well preserved after 9 years in formalin, was not preserved after 50 years in formalin, and there were appreciable inconsistencies between Aβ20 and tau/tau-8 stains after 50 years of formalin fixation. It is conceivable that Aβ20 immunoreactivity could be restored by some other technique, such as microwave treatment of hypoxanized, but we have not explored this possibility."                                                                                                                                                                                                                                                                                                                                                                                                                                                                                                                                                                                                                    |
| Dwork 1998     | 1998 | <a href="#">https://pubmed.ncbi.nlm.nih.gov/9444444/</a>  | Formalin                                                                 | 30 years                              | Light microscopy after staining with the Aβ20 antibody for tau                 | Biomolecular staining            | Immunoreactivity completely absent                                                                                                                                        | 0                    | 2                    | 2                       | 2                  | Loss of antigenicity             |                                                                                                                                                                                                                                                                                                                                                                                                                                                                                                                                                                                                                                                                                                                                                                                                                                                                                                                                                                                                                                                     |
| Sheaffer 1999  | 1999 | <a href="#">https://pubmed.ncbi.nlm.nih.gov/10444444/</a> | Formalin, undecor after fixation, undecor after fixation                 | 53 years                              | Light microscopy after staining for Vimentin and Luxol fast blue myelin stains | Morphologic staining             | The morphology of individual myelin sheaths is preserved                                                                                                                  | 0                    | 0                    | Independent grade, plac | 0                  |                                  | "nerveof and Luxol fast blue stains of the resulting sections yielded staining whose quality was unaffected by the duration of fixation. Myelinated and unmyelinated areas were clearly distinguished, and the morphology of individual myelin sheaths was well defined. No changes to conventional methods were required, but it was necessary to carefully monitor the progress of differentiation." "F7B stains (Figure 2c, d) showed well-defined myelin sheaths regardless of the fixation interval, but artifactual thinning sometimes present in thin sections. At low power, the myelin sheaths lacked clear definition, the background was blurred, and there was staining of nuclei and oligodendrocyte cell bodies (Figure 2c, d). On the other hand, in tissue fixed for less than one year, the myelin sheaths were clearly demarcated, and there was no staining of oligodendroglial cytoplasm (Figure 2c, d). Immunoreactivity for F7B demonstrated astrocytic morphology clearly, regardless of the fixation interval (Figure 4c)." |
| Sheaffer 1999  | 1999 | <a href="#">https://pubmed.ncbi.nlm.nih.gov/10444444/</a> | Formalin, undecor after fixation, undecor after fixation                 | 53 years                              | Light microscopy after staining for GFAP                                       | Biomolecular staining            | Astrocyte morphology is clearly displayed                                                                                                                                 | 0                    | 0                    | Independent grade, plac | 0                  |                                  |                                                                                                                                                                                                                                                                                                                                                                                                                                                                                                                                                                                                                                                                                                                                                                                                                                                                                                                                                                                                                                                     |
| Sheaffer 1999  | 1999 | <a href="#">https://pubmed.ncbi.nlm.nih.gov/10444444/</a> | Formalin, undecor after fixation, undecor after fixation                 | 53 years                              | Light microscopy after staining for myosin basic protein                       | Biomolecular staining            | Fine detail is lost from the myelin sheaths and there is staining of oligodendrocyte cytoplasm and nuclei, which is not typically seen                                    | 1                    | 0                    | Independent grade, plac | 2                  | Loss of antigenicity             |                                                                                                                                                                                                                                                                                                                                                                                                                                                                                                                                                                                                                                                                                                                                                                                                                                                                                                                                                                                                                                                     |
| Martin 1999    | 1999 | <a href="#">https://pubmed.ncbi.nlm.nih.gov/10444444/</a> | 10% formalin                                                             | 0.21 years                            | Light microscopy after immunostaining for brain myosin-V                       | Biomolecular staining            | Intact immunostaining                                                                                                                                                     | 0                    | 0                    | Independent grade, plac | 0                  |                                  |                                                                                                                                                                                                                                                                                                                                                                                                                                                                                                                                                                                                                                                                                                                                                                                                                                                                                                                                                                                                                                                     |
| Martin 1999    | 1999 | <a href="#">https://pubmed.ncbi.nlm.nih.gov/10444444/</a> | 10% formalin                                                             | 1.67 years                            | Light microscopy after immunostaining for brain myosin-V                       | Biomolecular staining            | Decreased levels of immunostaining                                                                                                                                        | 0                    | 0                    | Independent grade, plac | 1                  | Loss of antigenicity             |                                                                                                                                                                                                                                                                                                                                                                                                                                                                                                                                                                                                                                                                                                                                                                                                                                                                                                                                                                                                                                                     |
| Martin 1999    | 1999 | <a href="#">https://pubmed.ncbi.nlm.nih.gov/10444444/</a> | 10% formalin                                                             | 2.33 years                            | Light microscopy after immunostaining for brain myosin-V                       | Biomolecular staining            | Absent immunostaining                                                                                                                                                     | 2                    | 0                    | Independent grade, plac | 2                  | Loss of antigenicity             |                                                                                                                                                                                                                                                                                                                                                                                                                                                                                                                                                                                                                                                                                                                                                                                                                                                                                                                                                                                                                                                     |
| Samat 1999     | 1999 | <a href="#">https://pubmed.ncbi.nlm.nih.gov/10444444/</a> | Formalin                                                                 | 0.02 years                            | Light microscopy after immunostaining for synaptophysin                        | Biomolecular staining            | Expected staining pattern for synaptophysin was lost                                                                                                                      | 2                    | 0                    | Independent grade, plac | 2                  | Loss of antigenicity             | Reports many months of storage to up to 6 years. For many months, assuming the most months have been used, male mice to report to less than a year (11), for postmortem purposes.                                                                                                                                                                                                                                                                                                                                                                                                                                                                                                                                                                                                                                                                                                                                                                                                                                                                   |
| Henzen 2000    | 2000 | <a href="#">https://pubmed.ncbi.nlm.nih.gov/10444444/</a> | Gelatin-embedded brain tissue in 10% formalin                            | 12 years                              | Light microscopy after staining with Gal4:gal4 immunoprecipitation             | Morphologic staining             | No effect on neuronal staining with Gal4:gal4 immunoprecipitation, but slightly less chromogenic staining in astrocytes and oligodendrocytes                              | 1                    | 0                    | Independent grade, plac | 1                  | Decreased silver staining        | "Brain tissue that had been fixed for prolonged periods (many months to years) in formalin lost the expected demonstrable synaptophysin reactivity by ICC and the antigen could not be retrieved to microwave heating for 10 min. Tissue preserved in paraffin over the same period sometimes yielded synaptophysin (good immunoreactivity), but the obvious loss of ICC of the antigen was not consistent because other tissue blocks yielded good results." "Storage of serially sectioned gelatin-embedded slices in formalin had no visible effect on the stability of neurons. We have recently stained serially sectioned gelatin-embedded slices in formalin for 12 years in 10% formalin. Only the nuclei of the serially sectioned slices were less chromogenic. A more significant problem is that prolonged storage in 10% formalin caused considerable shrinkage of gelatin-embedded brain slices."                                                                                                                                     |
| Privat 2000    | 2000 | <a href="#">https://pubmed.ncbi.nlm.nih.gov/10444444/</a> | 10% formalin                                                             | 29 years                              | Light microscopy after immunostaining for prión protein                        | Biomolecular staining            | Immunostaining is still intact and noted to have marked positivity, the same staining given to samples fixed for only 1 month                                             | 0                    | 0                    | Independent grade, plac | 0                  |                                  | "In fact, at all CJD cases except for cases 2 and 3, there was an increased immunoreactivity, as compared to the usual immunoreactivity pattern. Interestingly enough, these cases with or absent immunoreactivity when PK was omitted had been chemically fixed for a long time (19 and 20 months, respectively). Two other cases (nos. 7 and 8) submitted to very long formalin fixations (20 and 20 years, respectively) were thus studied. The intensity of immunoreactivity in the cerebral cortex increased significantly after PK proteolysis in one case (8) but no immunoreactivity was found elsewhere in the preparation in the other cases (7)."                                                                                                                                                                                                                                                                                                                                                                                        |
| Wu 2002        | 2002 | <a href="#">https://pubmed.ncbi.nlm.nih.gov/10444444/</a> | 2% paraformaldehyde in 0.1 mol/L phosphate-buffered saline (PBS) at 4 °C | 0.5 years                             | Light microscopy after immunostaining for GFAP                                 | Biomolecular staining            | No significant difference in immunostaining intensity or areas when comparing specimens stored for short duration (less than 1 year) to long duration (more than 5 years) | 0                    | 0                    | Independent grade, plac | 0                  |                                  | "The results for the IBD study showed no significant decay of both GFAP immunoreactivity and distribution in long-term (9.3 years) compared to short IBD (mean 1.6 years) at all three levels of expression, constitutive, aberrant and total. This suggests that ongoing storage duration in fixatives does not lead to significant degradation of GFAP immunoreactivity."                                                                                                                                                                                                                                                                                                                                                                                                                                                                                                                                                                                                                                                                         |
| Roskajski 2003 | 2003 | <a href="#">https://pubmed.ncbi.nlm.nih.gov/10444444/</a> | 10% formalin                                                             | 55 years                              | Light microscopy after Golgi-Kopetz silver staining                            | Morphologic staining             | Intact neuronal morphology in Golgi-Kopetz immunoprecipitation, including dendritic spines, with no qualitative changes in antigen immunoprecipitation noted              | 0                    | 0                    | Independent grade, plac | 0                  |                                  | "However, for studies of 50 years of fixation, rapid Golgi staining was clearly inadequate, while the Golgi-Kopetz method gave excellent results comparable to tissue fixed for a few years (Fig. 3). When fixation ranged from 10 months to 20 years, virtually all cases yielded large numbers of specimens from the perfusion- and immersion-fixed brains showed that CD45 was well preserved in this material, even with long-term storage of the specimens in 10% PFA at 4°C (Figure 8b)."                                                                                                                                                                                                                                                                                                                                                                                                                                                                                                                                                     |
| Roskajski 2003 | 2003 | <a href="#">https://pubmed.ncbi.nlm.nih.gov/10444444/</a> | 10% formalin                                                             | 5 years                               | Light microscopy after rapid Golgi silver staining                             | Morphologic staining             | Fewer impregnated neurons and lower quality results                                                                                                                       | 1                    | 0                    | Independent grade, plac | 1                  | Decreased silver staining        | "The quality of the myelin staining was independent of the different histological procedures used."                                                                                                                                                                                                                                                                                                                                                                                                                                                                                                                                                                                                                                                                                                                                                                                                                                                                                                                                                 |
| Roskajski 2003 | 2003 | <a href="#">https://pubmed.ncbi.nlm.nih.gov/10444444/</a> | 10% formalin                                                             | 1.17 years                            | Light microscopy after myelin staining methods                                 | Morphologic staining             | No reported effect of storage on myelin staining quality                                                                                                                  | 0                    | 0                    | Independent grade, plac | 0                  |                                  | "This 2. Portal cortex from human autopsy brain fixed in formalin for 5 years. Impregnations of dendritic tissue and spines of individual neurons are similarly comparative with rapid Golgi (A, C) and Golgi-Kopetz (B, D). More neurons are stained with Golgi-Kopetz, and lighter background appears greater clarity."                                                                                                                                                                                                                                                                                                                                                                                                                                                                                                                                                                                                                                                                                                                           |
| Liang 2004     | 2004 | <a href="#">https://pubmed.ncbi.nlm.nih.gov/10444444/</a> | 10% neutral-buffered formalin                                            | 18 years                              | Light microscopy after staining for VMAT2                                      | Biomolecular staining            | No reported differences in immunostaining pattern for VMAT2                                                                                                               | 0                    | 0                    | Independent grade, plac | 0                  |                                  | "It is interesting that the ISI values for both VMAT2 and TH proteins are similar in the three DA-colour regions across all cases despite coming from brains that were stored for the longest and shortest times in formalin (DA-32 and DA-39, respectively; Tables 1, 2)."                                                                                                                                                                                                                                                                                                                                                                                                                                                                                                                                                                                                                                                                                                                                                                         |
| Liang          |      |                                                           |                                                                          |                                       |                                                                                |                                  |                                                                                                                                                                           |                      |                      |                         |                    |                                  |                                                                                                                                                                                                                                                                                                                                                                                                                                                                                                                                                                                                                                                                                                                                                                                                                                                                                                                                                                                                                                                     |



| Study            | Year | Link                                                                                                                                  | Storage conditions                                             | Storage duration for reported outcome | Visualization method                                                                                                                                               | Observation category predominant | Storage effect (An asterisk (*) indicates that the study does not specifically comment on histologic storage effects, but it can be inferred based on their results.)                                                                                            | Effect on morphology | Effect on morphology gra | Consensus grade | Category of change   | Effect on morphology grade notes                                                                                                                                               | Relevant text                                                                                                                                                                                                                                                                                                                                                                                                                                                                                                                                                                                                                                                                                                                                                                                                                                                                                                                                                                                                                                                                                                                                                                                                                                                                    |
|------------------|------|---------------------------------------------------------------------------------------------------------------------------------------|----------------------------------------------------------------|---------------------------------------|--------------------------------------------------------------------------------------------------------------------------------------------------------------------|----------------------------------|------------------------------------------------------------------------------------------------------------------------------------------------------------------------------------------------------------------------------------------------------------------|----------------------|--------------------------|-----------------|----------------------|--------------------------------------------------------------------------------------------------------------------------------------------------------------------------------|----------------------------------------------------------------------------------------------------------------------------------------------------------------------------------------------------------------------------------------------------------------------------------------------------------------------------------------------------------------------------------------------------------------------------------------------------------------------------------------------------------------------------------------------------------------------------------------------------------------------------------------------------------------------------------------------------------------------------------------------------------------------------------------------------------------------------------------------------------------------------------------------------------------------------------------------------------------------------------------------------------------------------------------------------------------------------------------------------------------------------------------------------------------------------------------------------------------------------------------------------------------------------------|
| Costantini 2020  | 2020 | <a href="https://www.biorxiv.org/content/10.1101/2020.05.14.244444v1">https://www.biorxiv.org/content/10.1101/2020.05.14.244444v1</a> | Neutral buffered formalin (pH 7.2-7.4) at room temperature     | 7 years                               | Fluorescence microscopy after staining with various antibodies (NeuN, MAP2, etc.) to label neurons, interneurons, glia, and vasculature, as well as nuclear stains | Biomolecular staining            | Intact imaging of the 3D organization of whole neurons                                                                                                                                                                                                           | 0                    | 0                        | 0               |                      |                                                                                                                                                                                | "In comparison to animal brains, human neural tissues presents high variability of post-mortem fixation conditions and antigens alterations that prevent proper immunostaining recognition. In this work, we combined the SWITCH tissue transformation method with the TDE clearing. The SWITCH technique allows removing lipids from the sample, while maintaining structural integrity, leading to an increase of tissue permeability and a reduction of the tissue refractive index (RI). The TDE clearing method allows homogenizing the RI of the sample with that of the mounting medium to reach the final transparency. The optimized protocol can perform tissue clearing on cryoprotected formalin-fixed brain samples and homogeneously stain the tissue with small molecules (up to 1 mm in depth) as well as antibodies (up to 500 µm). The compatibility of the protocol with different antibodies is demonstrated by staining neuronal and non-neuronal cells as well as blood vessels with different antibodies. . The optical sectioning and the high-resolution optical investigation made possible by TPFM in combination with the tissue clearing technique, allowed imaging the 3D organization of whole neurons without introducing any visual artifacts." |
| Fior-Garcia 2020 | 2020 | <a href="https://pubmed.ncbi.nlm.nih.gov/32444444/">https://pubmed.ncbi.nlm.nih.gov/32444444/</a>                                     | 3.7% formalin                                                  | 0.5 years                             | Light microscopy after staining for DCX                                                                                                                            | Biomolecular staining            | Abolishes immunostaining signal for DCX                                                                                                                                                                                                                          | 2                    | 2                        | 2               | Loss of antigenicity | Very similar data set as <a href="#">Lacoste-Samson 2016</a> , but more discussion on the storage effects in this article, so this one will supersede that one.                | "Note that formalin fixation completely abolished the DCX signal for all the anti-DCX antibodies used and caused the appearance of an unspecific nuclear signal" - "Staining with the same anti-DCX antibodies on samples fixed in 3.7% formalin for 6 months. Note that formalin fixation completely abolished the DCX signal for all the anti-DCX antibodies used and caused the appearance of an unspecific nuclear signal. (ab-ab)"                                                                                                                                                                                                                                                                                                                                                                                                                                                                                                                                                                                                                                                                                                                                                                                                                                          |
| Fior-Garcia 2020 | 2020 | <a href="https://pubmed.ncbi.nlm.nih.gov/32444444/">https://pubmed.ncbi.nlm.nih.gov/32444444/</a>                                     | 3.7% formalin                                                  | 0.5 years                             | Light microscopy after staining for PSA-NCAM                                                                                                                       | Biomolecular staining            | Abolishes immunostaining signal for PSA-NCAM                                                                                                                                                                                                                     | 2                    | 2                        | 2               | Loss of antigenicity |                                                                                                                                                                                | "Staining with an anti-astrocyte-specific anti-oligodendrocyte (PSA-NCAM) antibody on samples fixed either at 4°C freshly prepared PFA for 24 (a6) or 6 (a7) h, or in 3.7% formalin for 6 months (a8). PSA-NCAM-specific signal and low background are observed in samples fixed in PFA (a6,a7). In contrast, formalin fixation completely abolished the PSA-NCAM signal and caused the appearance of an unspecific nuclear signal"                                                                                                                                                                                                                                                                                                                                                                                                                                                                                                                                                                                                                                                                                                                                                                                                                                              |
| Fior-Garcia 2020 | 2020 | <a href="https://pubmed.ncbi.nlm.nih.gov/32444444/">https://pubmed.ncbi.nlm.nih.gov/32444444/</a>                                     | 3.7% formalin                                                  | 0.5 years                             | Light microscopy after staining for NeuN                                                                                                                           | Biomolecular staining            | NeuN signal can still be seen, but with a substantially increased background signal                                                                                                                                                                              | 1                    | 1                        | 1               | Loss of antigenicity |                                                                                                                                                                                | "Staining with an anti-NeuN antibody on samples that had been fixed either in 4°C freshly prepared PFA for 24 (a6) or 6 (a7) h, or in 3.7% formalin for 6 months (a8). Note that the NeuN-specific signal can be observed in the three fixation conditions. However, a substantial increase in the background is observed in samples fixed in formalin"                                                                                                                                                                                                                                                                                                                                                                                                                                                                                                                                                                                                                                                                                                                                                                                                                                                                                                                          |
| Chen 2020        | 2020 | <a href="https://pubmed.ncbi.nlm.nih.gov/32444444/">https://pubmed.ncbi.nlm.nih.gov/32444444/</a>                                     | Formalin (listed in <a href="#">Lacoste 2020</a> )             | 70 years                              | Light microscopy after Nissl staining                                                                                                                              | Morphologic staining             | Brains stored for different periods of time have the same neuron and glial cell densities and all cells appear stained with the Nissl stain, without a significant effect of storage time                                                                        | 0                    | 0                        | 0               |                      | Effectively the same data set as <a href="#">Lacoste 2020</a> . But, there is more discussion on storage effects in this article, so this publication will supersede that one. | "Volume and cell number did not correlate noticeably with age, storage time, and PMI (Fig. 4. PMI data not shown)." - "From a technical point of view, processing differences (including storage time and PMI) between the two tissue collections is unlikely to create a different number of observable cells in the thionin stain for Nissl substance. All cells appeared stained and we counted both neurons and glial cells, and different cells forming only a minuscule uncounted fraction of the total. Thus, our cell number estimates should be robust to this limitation. On the other hand, potential differences in initial tissue processing could cause the observed differences in hippocampal volumes. However, as the observed mean cell densities were virtually identical between groups in most regions (Fig. 3), the volume changes closely matched the robust cell number changes. Therefore, the observed volume changes are most likely of biological origin." - "As indicated in Fig. 3 and Table 2, we did not detect any significant differences in the numerical density of neurons or glial cells."                                                                                                                                                 |
| Herbin 2021      | 2021 | <a href="https://doi.org/10.1101/2021.05.14.244444v1">https://doi.org/10.1101/2021.05.14.244444v1</a>                                 | Formalin                                                       | 92 years                              | Light microscopy after hematoxylin-eosin and Giemsa staining                                                                                                       | Morphologic staining             | Fine and cellular features are preserved, with few tissue perforations. Able to identify pyramidal cells, but can't say for sure whether the storage time may have affected some cellular parameters. They didn't describe any obvious storage artifacts, though | 0                    | 1                        | 1               |                      |                                                                                                                                                                                | "In contrast, the best results were obtained with group F (100% formalin), with even small glial cells visible in the preserved brain tissue. This excellent preservation of fine and even cellular details in the tissue underlines the potential of group F brains for histochemical studies—as long as they are fixed rapidly after the death of the organism"                                                                                                                                                                                                                                                                                                                                                                                                                                                                                                                                                                                                                                                                                                                                                                                                                                                                                                                |
| Larsen 2021      | 2021 | <a href="https://pubmed.ncbi.nlm.nih.gov/32444444/">https://pubmed.ncbi.nlm.nih.gov/32444444/</a>                                     | 4% formaldehyde in phosphate buffer at neutral pH              | 21 years                              | Light microscopy after serial sectioning and staining with toluidine blue                                                                                          | Morphologic staining             |                                                                                                                                                                                                                                                                  | NA                   | NA                       | NA              |                      |                                                                                                                                                                                | "Also, even after 2 weeks of storage in AKB solution, most of the fluorescent signals were well preserved, indicating that tissue cleared with AKB was very stable (Additional file 2: Fig. S2)."                                                                                                                                                                                                                                                                                                                                                                                                                                                                                                                                                                                                                                                                                                                                                                                                                                                                                                                                                                                                                                                                                |
| Shen 2022        | 2022 | <a href="https://pubmed.ncbi.nlm.nih.gov/32444444/">https://pubmed.ncbi.nlm.nih.gov/32444444/</a>                                     | Formalin                                                       | 2 years                               | 3D fluorescence microscopy after staining for GFAP                                                                                                                 | Biomolecular staining            | Morphology of astrocytes via GFAP staining appears to be intact"                                                                                                                                                                                                 | NA                   | NA                       | NA              |                      |                                                                                                                                                                                |                                                                                                                                                                                                                                                                                                                                                                                                                                                                                                                                                                                                                                                                                                                                                                                                                                                                                                                                                                                                                                                                                                                                                                                                                                                                                  |
| Wu 2022          | 2022 | <a href="https://pubmed.ncbi.nlm.nih.gov/32444444/">https://pubmed.ncbi.nlm.nih.gov/32444444/</a>                                     | 10% neutral buffered formalin                                  | 3.33 years                            | Light microscopy after staining for NeuN                                                                                                                           | Biomolecular staining            | Decreased staining intensity for NeuN, by 19.3%                                                                                                                                                                                                                  | 1                    | 1                        | 1               | Loss of antigenicity |                                                                                                                                                                                |                                                                                                                                                                                                                                                                                                                                                                                                                                                                                                                                                                                                                                                                                                                                                                                                                                                                                                                                                                                                                                                                                                                                                                                                                                                                                  |
| Wu 2022          | 2022 | <a href="https://pubmed.ncbi.nlm.nih.gov/32444444/">https://pubmed.ncbi.nlm.nih.gov/32444444/</a>                                     | 10% neutral buffered formalin                                  | 3.33 years                            | Light microscopy after staining for Nissl                                                                                                                          | Morphologic staining             | Decreased staining intensity for Nissl, by 16.6%                                                                                                                                                                                                                 | 1                    | 1                        | 1               | Loss of antigenicity |                                                                                                                                                                                |                                                                                                                                                                                                                                                                                                                                                                                                                                                                                                                                                                                                                                                                                                                                                                                                                                                                                                                                                                                                                                                                                                                                                                                                                                                                                  |
| Wu 2022          | 2022 | <a href="https://pubmed.ncbi.nlm.nih.gov/32444444/">https://pubmed.ncbi.nlm.nih.gov/32444444/</a>                                     | 10% neutral buffered formalin                                  | 3.33 years                            | Light microscopy after staining for GFAP                                                                                                                           | Biomolecular staining            | No reported change in staining intensity                                                                                                                                                                                                                         | 0                    | 0                        | 0               |                      |                                                                                                                                                                                |                                                                                                                                                                                                                                                                                                                                                                                                                                                                                                                                                                                                                                                                                                                                                                                                                                                                                                                                                                                                                                                                                                                                                                                                                                                                                  |
| Wu 2022          | 2022 | <a href="https://pubmed.ncbi.nlm.nih.gov/32444444/">https://pubmed.ncbi.nlm.nih.gov/32444444/</a>                                     | 10% neutral buffered formalin                                  | 3.33 years                            | Light microscopy after staining for IBA-1                                                                                                                          | Biomolecular staining            | No reported change in staining intensity                                                                                                                                                                                                                         | 0                    | 0                        | 0               |                      |                                                                                                                                                                                |                                                                                                                                                                                                                                                                                                                                                                                                                                                                                                                                                                                                                                                                                                                                                                                                                                                                                                                                                                                                                                                                                                                                                                                                                                                                                  |
| Wu 2022          | 2022 | <a href="https://pubmed.ncbi.nlm.nih.gov/32444444/">https://pubmed.ncbi.nlm.nih.gov/32444444/</a>                                     | 10% neutral buffered formalin                                  | 3.33 years                            | Light microscopy after staining for GFAP                                                                                                                           | Biomolecular staining            | No reported change in staining intensity                                                                                                                                                                                                                         | 0                    | 0                        | 0               |                      |                                                                                                                                                                                |                                                                                                                                                                                                                                                                                                                                                                                                                                                                                                                                                                                                                                                                                                                                                                                                                                                                                                                                                                                                                                                                                                                                                                                                                                                                                  |
| Wiggemann 2022   | 2022 | <a href="https://pubmed.ncbi.nlm.nih.gov/32444444/">https://pubmed.ncbi.nlm.nih.gov/32444444/</a>                                     | 1% formalin diluted in phosphate-buffered saline (PBS) at 4 °C | 14 years                              | Light microscopy after staining for LFB and PLP                                                                                                                    | Morphologic staining             | No reported difficulties with cellular visualization and identification based on storage time"                                                                                                                                                                   | NA                   | NA                       | NA              |                      |                                                                                                                                                                                | "The lack of reported continuity between PLP/LFB-PAS staining metrics and storage time, and their independent contributions to predicting MRI metrics, implies these histological measures do not appear to be substantially associated with storage time based on the data presented."                                                                                                                                                                                                                                                                                                                                                                                                                                                                                                                                                                                                                                                                                                                                                                                                                                                                                                                                                                                          |
| Ostrik 2022      | 2022 | <a href="https://pubmed.ncbi.nlm.nih.gov/32444444/">https://pubmed.ncbi.nlm.nih.gov/32444444/</a>                                     | 10% neutral buffered formalin at room temperature              | 17 years                              | Confocal microscopy after staining with the lipophilic dye DiI                                                                                                     | Morphologic staining             | No reported effect of storage on nerve tracing extent                                                                                                                                                                                                            | 0                    | 0                        | 0               |                      |                                                                                                                                                                                | "Our work showed that a lipophilic dye differentiation of 25.11 ± 9.1 mm and 12.11 ± 6.62 mm of distal and proximal travel on the peripheral nerves of formalin-fixed human fetuses with up to 18-year postmortem delay is feasible. This distance is comparable to those achieved in tissues in which tracing are rapidly processed with a maximum of 2–3-day postmortem delay and is meaningful for tracing peripheral nerves."                                                                                                                                                                                                                                                                                                                                                                                                                                                                                                                                                                                                                                                                                                                                                                                                                                                |
| Insausti 2023    | 2023 | <a href="https://pubmed.ncbi.nlm.nih.gov/32444444/">https://pubmed.ncbi.nlm.nih.gov/32444444/</a>                                     | 4% paraformaldehyde at 4 °C                                    | 5 years                               | Light microscopy and electron microscopy                                                                                                                           | Morphologic staining             | Good histologic results via light microscopy and electron microscopy                                                                                                                                                                                             | 0                    | 0                        | 0               |                      |                                                                                                                                                                                | "The brain is weighed on a scale and placed in a sealed container with a hermetic cover to avoid evaporation and formalin fumes, with the ventral surface up, and abundant glucose at the bottom (Figures S5–S7). 3 L of freshly prepared 4% paraformaldehyde is poured into the container, or enough to cover the brain. On top of the brain, we place additional glucose soaked in 4% paraformaldehyde. The brain is then stored in a cold room at 4 °C for postfixation, where it remains intact until processing for study. The time of postfixation is variable, according to the research needs, but we have processed brain tissue up to 5 years after intracardial perfusion, both at the microscopic and ultrastructural levels with good results (see below)."                                                                                                                                                                                                                                                                                                                                                                                                                                                                                                         |
| Schueh 2023      | 2023 | <a href="https://pubmed.ncbi.nlm.nih.gov/32444444/">https://pubmed.ncbi.nlm.nih.gov/32444444/</a>                                     | 4% paraformaldehyde in 0.1 M phosphate buffered saline (PBS)   | 2.5 years                             | Light-sheet fluorescence microscopy with a morphologic NeuroTrace Nissl stain                                                                                      | Morphologic staining             | Morphology is well preserved after tissue processing"                                                                                                                                                                                                            | NA                   | NA                       |                 |                      |                                                                                                                                                                                | "Subsequently, brain samples were recovered by calvarian dissection and stored in 4% paraformaldehyde in 0.1 M phosphate buffered saline (PBS) for 14–30 months. . . The morphology of the MAb10 cleared samples is well preserved after dehydration, delipidation and refractive index (RI) matching, and both grey as well as white matter become highly transparent"                                                                                                                                                                                                                                                                                                                                                                                                                                                                                                                                                                                                                                                                                                                                                                                                                                                                                                          |
| Wuehle 2023      | 2023 | <a href="https://pubmed.ncbi.nlm.nih.gov/32444444/">https://pubmed.ncbi.nlm.nih.gov/32444444/</a>                                     | Formalin                                                       | 18 years                              | Fluorescence microscopy after MAP2 immunostaining                                                                                                                  | Biomolecular staining            | Tissue cleared and imaged with confocal microscopy with reliable MAP2 labeling                                                                                                                                                                                   | 0                    | 0                        | 0               |                      |                                                                                                                                                                                | Figure 2 - Figure Supplement 1 - "When all six study cases were viewed in a row, the MAP2 antibody provided reliable labeling of the target structures in cleared sections independent of their fixation method and total fixation time, whereas sections without CLARITY® pretreatment showed variable and inconsistent outcomes with sometimes ungraceful antibody-rich or even no specific labeling"                                                                                                                                                                                                                                                                                                                                                                                                                                                                                                                                                                                                                                                                                                                                                                                                                                                                          |
| Lin 2023         | 2023 | <a href="https://www.biorxiv.org/content/10.1101/2023.05.14.244444v1">https://www.biorxiv.org/content/10.1101/2023.05.14.244444v1</a> | 10% formalin                                                   | 1.12 years                            | Fluorescence microscopy after staining with GFAP                                                                                                                   | Biomolecular staining            | Loss of antigenicity for astrocyte foot processes                                                                                                                                                                                                                | 2                    | 1                        | 1               | Loss of antigenicity |                                                                                                                                                                                | "The results indicated that three-dimensional (3D) expression patterns of biological markers could be preserved for decades and revealed later by performing AGCAT." - "The astrocyte foot processes were stained in the brain specimen stored in an FPFE block for 60 days, but not in the formalin-preserved brain blocks stored for 1 year and 45 days (Fig. 4a), indicating that FPFE is superior to formalin for antigenicity preservation."                                                                                                                                                                                                                                                                                                                                                                                                                                                                                                                                                                                                                                                                                                                                                                                                                                |
