# Supplementary material
Source: PubMed Central journal article supplement (PMC11058410)
Supplement: freeneuropathol-05-10-5373-s8.pdf [file freeneuropathol-05-10-5373-s8.pdf]

| Study         | Year | Link                                                                                            | Storage conditions                                                                              | Storage duration for reported outcome | Visualization method                           | Storage effect                                                                                      | Relevant text                                                                                                                                                                                                                                                                                                                                                                                                           |
|---------------|------|-------------------------------------------------------------------------------------------------|-------------------------------------------------------------------------------------------------|---------------------------------------|------------------------------------------------|-----------------------------------------------------------------------------------------------------|-------------------------------------------------------------------------------------------------------------------------------------------------------------------------------------------------------------------------------------------------------------------------------------------------------------------------------------------------------------------------------------------------------------------------|
| Watson 1986   | 1986 | <a href="https://pubmed.ncbi.nlm.nih.gov/2811111/">https://pubmed.ncbi.nlm.nih.gov/2811111/</a> | Free floating sections stored in phosphate buffered saline                                      | 6 weeks                               | Light microscopy after immunostaining for LHRH | Increased non-specific staining and the tissue tore and shredded easily while undergoing processing | "In contrast, while immunocytochemical labeling of neuronal elements was still detectable in tissue stored for up to 6 weeks in PBS, the tissue was typically unworkable in that it tore and was shredded easily while undergoing immunocytochemical processing. Also, non-specific staining was markedly increased following long term storage in PBS"                                                                 |
| Morán 1992    | 1992 | <a href="https://pubmed.ncbi.nlm.nih.gov/1311111/">https://pubmed.ncbi.nlm.nih.gov/1311111/</a> | Storage of brain sections in 0.1 M phosphate buffer without sodium azide at 4° C                | 5 days                                | Light microscopy after immunostaining          | "Good histological conditions" lost after 5 days                                                    | "Sections kept in 0.1 M phosphate buffer without sodium azide at 4°C, maintained good histological conditions for only 5 days. In 0.1 M phosphate buffer with sodium azide at 4°C, after 7 weeks the sections showed a reduction of AChE in positive varicose fibers, NFT and SP while BChE could be demonstrated only in some SP"                                                                                      |
| Morán 1992    | 1992 | <a href="https://pubmed.ncbi.nlm.nih.gov/1311111/">https://pubmed.ncbi.nlm.nih.gov/1311111/</a> | Storage of brain sections in 0.1 M phosphate buffer with sodium azide at 4° C                   | 7 weeks                               | Light microscopy after immunostaining          | Better apparent maintenance of histology, but loss of some histochemistry after 7 weeks of storage  |                                                                                                                                                                                                                                                                                                                                                                                                                         |
| Reynolds 1994 | 1994 | <a href="https://pubmed.ncbi.nlm.nih.gov/1311111/">https://pubmed.ncbi.nlm.nih.gov/1311111/</a> | Either 0.1M sodium phosphate or 0.1M sodium cacodylate (pH 7.4)                                 | 17 months                             | Confocal microscopy                            | No reported change in confocal fluorescence of myelinated fibers                                    | "While good quality images of myelinated fibres can be acquired immediately following (glutaraldehyde) perfusion, maximal levels of fluorescence intensity were reached at about 2 weeks post-perfusion and appeared to be maintained for at least 15 months (the longest period investigated). This notable maintenance of fluorescence intensity permits specimens to be examined at the investigators' convenience." |
| Levine 2013   | 2013 | <a href="https://pubmed.ncbi.nlm.nih.gov/2411111/">https://pubmed.ncbi.nlm.nih.gov/2411111/</a> | 0.1 M Phosphate Buffer                                                                          | 3 months                              | Light microscopy after Golgi-Cox staining      | No reported changes in Golgi impregnation quality                                                   | "NHP brain sections selected for Golgi-Cox impregnation were transferred from 0.1M PB to unsubbed (50x75mm) slides and 'sandwiched' as described above for rat brain sections with the exception that tissue remained in sealed vials of 0.1M PB for up to three months while we established the optimal method for Golgi-Cox impregnation."                                                                            |
| Beach 2015    | 2015 | <a href="https://pubmed.ncbi.nlm.nih.gov/2611111/">https://pubmed.ncbi.nlm.nih.gov/2611111/</a> | Sections stored in 0.1 mol/L phosphate buffer with 0.1% sodium azide, in a refrigerator at 4° C | Years                                 | Light microscopy after immunostaining          | Excellent for immunohistochemistry studies after years of storage                                   | "Pre-cut free-floating 40 µm and 80 µm sections, as well as unsectioned fixed wet brain blocks, are stored in 0.1 mol/L phosphate buffer with 0.1% sodium azide, in a refrigerator at 4°C (sections) or at room temperature (fixed wet brain blocks). Sections and tissue stored in this manner are excellent for IHC studies even after years of storage."                                                             |
| Beach 2015    | 2015 | <a href="https://pubmed.ncbi.nlm.nih.gov/2611111/">https://pubmed.ncbi.nlm.nih.gov/2611111/</a> | Blocks stored in 0.1 mol/L phosphate buffer with 0.1% sodium azide, at room temperature         | Years                                 | Light microscopy after immunostaining          | Excellent for immunohistochemistry studies after years of storage                                   |                                                                                                                                                                                                                                                                                                                                                                                                                         |
| Sele 2020     | 2020 | <a href="https://forschung.fhnw.ch/">https://forschung.fhnw.ch/</a>                             | 0.1 M cacodylate buffer pH 7.4 or 0.1 M phosphate buffer pH 7.4 with sodium azide               | Up to 14 months                       | Electron microscopy                            | No adverse effect of storage length on ultrastructure, based on quantitative ratings                | "No significant differences in the ratings could be determined when the initial score was compared with the score of the stored samples. Therefore, no adverse effects regarding the duration of storage on the ultrastructure could be recognised."                                                                                                                                                                    |
