# Supplementary material
Source: PubMed Central journal article supplement (PMC11058410)
Supplement: freeneuropathol-05-10-5373-s10.pdf [file freeneuropathol-05-10-5373-s10.pdf]

| Study        | Year | Link                                                                    | Storage conditions                                                                                                                                                               | Storage length                   | Storage effect                                                                           | Notes                                                                      | Relevant text                                                                                                                                                                                                                                                                                                                                                                                                                |
|--------------|------|-------------------------------------------------------------------------|----------------------------------------------------------------------------------------------------------------------------------------------------------------------------------|----------------------------------|------------------------------------------------------------------------------------------|----------------------------------------------------------------------------|------------------------------------------------------------------------------------------------------------------------------------------------------------------------------------------------------------------------------------------------------------------------------------------------------------------------------------------------------------------------------------------------------------------------------|
| Liu 2016     | 2016 | <a href="https://pubmed.ncbi.nlm.nih/">https://pubmed.ncbi.nlm.nih/</a> | Phosphate-buffered saline with Triton-X                                                                                                                                          | "Indefinitely"                   | Claims that cleared brain tissue can be stored "indefinitely" under these conditions     | Unclear if this is more of a theoretical claim or based on empirical data. |                                                                                                                                                                                                                                                                                                                                                                                                                              |
| Hahn 2019    | 2019 | <a href="https://pubmed.ncbi.nlm.nih/">https://pubmed.ncbi.nlm.nih/</a> | Storage in dibenzyl ether                                                                                                                                                        | 22 months                        | EGFP fluorescence retained along with structural details                                 |                                                                            | "Even after almost 2 years (22 months) storage time, EGFP fluorescent brains optically cleared in stabilised DBE could be recorded with structural details"                                                                                                                                                                                                                                                                  |
| Zhao 2020    | 2020 | <a href="https://www.ncbi.nlm.nih/">https://www.ncbi.nlm.nih/</a>       | Stored in BABB (benzyl benzoate: benzyl alcohol) solution                                                                                                                        | At least 9 months after clearing | Good preservation of fluorescence histology signals                                      |                                                                            | "Another advantage of our approach is that, after SHANEL histology, the specimens become hard, enabling easy handling of complete organs and slices. Finally, owing to the complete dehydration and incubation in organic solvents, the tissues are preserved by SHANEL histology, allowing long-term storage for the future studies by the same investigators or in other labs."                                            |
| Sufieva 2022 | 2022 | <a href="https://pubmed.ncbi.nlm.nih/">https://pubmed.ncbi.nlm.nih/</a> | Methyl salicylate, samples hermetically sealed in glass containers<br>Stored in BABB (benzyl benzoate: benzyl alcohol) solution, covered with aluminum foil, at room temperature | 25 years                         | Histology remains unchanged, and all evaluated antigens maintained their characteristics | Preservation of choroid plexus tissue.                                     | "The storage of human choroid plexus in methyl salicylate for 25 years does not impair its histomorphology and preserves the properties of all the antigens assessed, which makes their immunohistochemical visualization possible using both light and fluorescence microscopy. Additionally, we found that long-term storage of human choroid plexus in methyl salicylate does not cause an increase in autofluorescence." |
| Mai 2022     | 2022 | <a href="https://pubmed.ncbi.nlm.nih/">https://pubmed.ncbi.nlm.nih/</a> | Stored in BABB (benzyl benzoate: benzyl alcohol) solution, covered with aluminum foil, at room temperature                                                                       | Months to years                  | Implication that imaging properties will remain intact after storage                     |                                                                            | "The cleared human organs in BABB solution can be stored covered with aluminum foil at room temperature for months to years before imaging."                                                                                                                                                                                                                                                                                 |
